# Supplementary material
Source: Springer Nature journal article supplement (https://www.springermedizin.de/resource/supplementary/12885_2013_4324_MOESM5_ESM.pdf/9467712)

**A. MCF-7**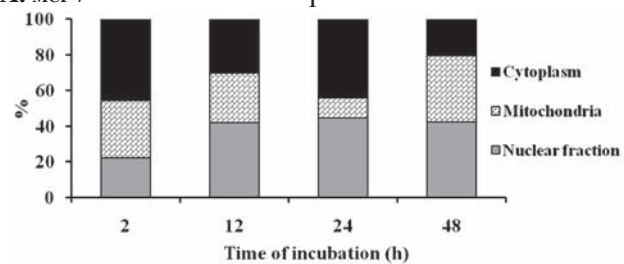**B. MDA-MB-231**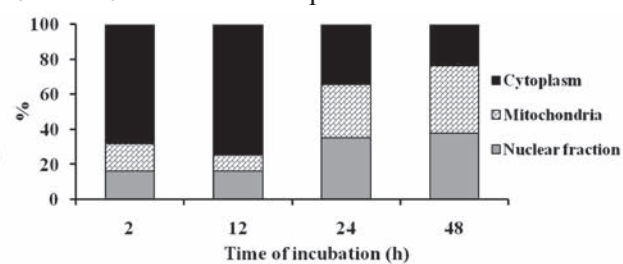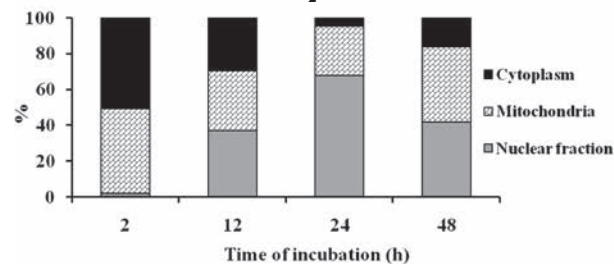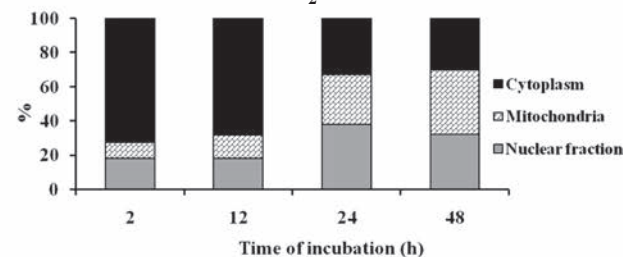**C. HCC1937**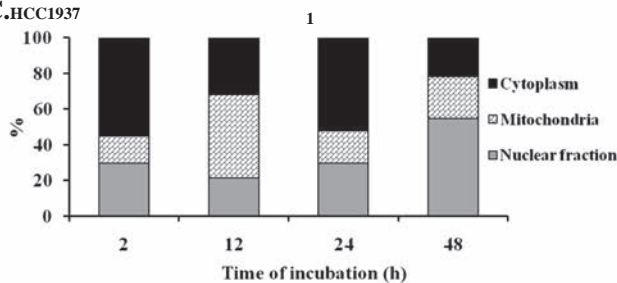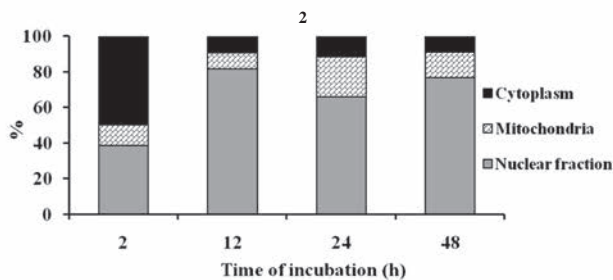

Supplement: MOESM5 [file 9467712]
